# Supplementary material for: Cold Acclimation Improves the Desiccation Stress Resilience of Polar Strains of Klebsormidium (Streptophyta)
Source: Front Microbiol. 2019 Aug 6;10:1730. doi: 10.3389/fmicb.2019.01730 (PMC6691101; doi:10.3389/fmicb.2019.01730)
Supplement: TABLE S1 — Statistics of the sequencing outcome. The number of read pairs, quality pairs, quality merged reads, quality single reads, and the mapping efficiency on the assembled transcripts are given for each replicate. Kd and Kf indicate K. dissectum and K. flaccidum. Five and 20 indicate the temperatures at which the experiment was performed. C, control cells; D, desiccated cells; HI, rewetted sample I (1 h); HII, rewetted sample II (24 h after the start of experiment). [file Table_1.xlsx]

## Sheet: Tabelle1
SampleReplicate	ReadPairs	QualityPairs	QualityMerged	QualitySingles	MappingEfficiency
Kd20C1	36570024	17002745	7919907	586335	99.06
Kd20C2	37314525	17569832	7779005	595084	99.06
Kd20C3	38367613	18062529	8238992	623138	99.07
Kd20D1	39669933	17821304	8511455	575763	99.04
Kd20D2	31396856	14603462	6501922	575102	98.98
Kd20D3	36521869	14091553	5615685	595491	99.08
Kd20HI1	33836663	17486483	5842217	703728	98.98
Kd20HI2	33886540	6979368	3818052	575501	98.93
Kd20HI3	34669709	16666723	6855144	625360	98.94
Kd20HII1	38204993	19024105	7525448	699567	99.1
Kd20HII2	35628541	18434306	6834825	711477	99.14
Kd20HII3	35532514	17603992	7149588	671866	98.98
Kd5C1	43089471	19459710	8730128	702057	99.17
Kd5C2	41386658	18829201	8265536	722842	99.12
Kd5C3	38949192	18777332	6961060	678830	99.18
Kd5D1	41539279	17953028	9024819	648861	99.1
Kd5D2	40319660	18344023	8407745	677781	99.07
Kd5D3	47207208	21366649	10060447	725751	99.18
Kd5HI1	40200994	18196185	8425153	665730	99.04
Kd5HI2	53299933	23886039	10941377	830157	99.18
Kd5HI3	36517487	17015514	7419781	568995	99.13
Kd5HII1	35337555	16031127	7611352	543262	99.04
Kd5HII2	36542622	18509397	7442443	629257	99.11
Kd5HII3	40918746	18773723	9171296	659505	99
Kf20C1	40113235	1437579	418312	780055	99.04
Kf20C2	40930511	4148541	1281769	780264	98.93
Kf20C3	36764918	10560549	2652391	755292	98.82
Kf20D1	41331235	19838465	7011135	671095	99.18
Kf20D2	34511753	9590872	4183106	573694	99.08
Kf20D3	34513328	5487061	1950390	595012	98.84
Kf20HI1	33373275	5442548	2007565	608757	98.9
Kf20HI2	34975864	2627619	1181059	596856	98.92
Kf20HI3	35630650	2740324	867863	662435	98.97
Kf20HII1	37797918	1389464	478923	704916	98.97
Kf20HII2	34777177	8654235	2753521	668352	98.89
Kf20HII3	35814437	2641871	1067491	661817	98.99
Kf5C1	41230394	19893621	7106661	782638	99.06
Kf5C2	36186383	17738720	6755957	752380	98.9
Kf5C3	38725288	19874130	6677280	751916	98.98
Kf5D1	32032512	12007300	6297828	652465	97.44
Kf5D2	37930225	18929633	6620644	774964	98.89
Kf5D3	39118628	19098506	7083928	840085	98.86
Kf5HI1	38088382	20187128	6194189	885300	98.92
Kf5HI2	39621286	14750753	6045333	841773	98.9
Kf5HI3	40071169	12662563	4335303	787453	99.11
Kf5HII1	37965949	6365020	2857755	670737	99.06
Kf5HII2	37167193	5871042	1956273	712476	99.08
Kf5HII3	37733667	3821420	1760440	710538	99.06
